# Supplementary material for: A designer DNA tetrahedron-based molecular beacon for tumor-related microRNA fluorescence imaging in living cells
Source: Royal Society of Chemistry journal article supplement (doi:10.1039/d2an00418f), 2022-01-01

### Supporting Information:

**Table S1.** Nucleotide sequences for forming TDFM nanoprobe.

| Name | Sequence (5'-3')                                                                |
|------|---------------------------------------------------------------------------------|
| S1   | ACATTCCTAAGTCTGAAACATTACAGCTTGCTACACGAGAAGAGCCGCCATAGTACTGAGGAC<br>GAGCTCCATTAC |
| S2   | TATCACCAGGCAGTTGACAGTGTAGCAAGCTGTAATAGATGCGAGGGTCCAATAC                         |
| S3   | TCAACTGCCTGGTGATAAAACGACACTACGTGGGAATGTACTATGGCGGCTCTTC                         |
| S4   | TTCAGACTTAGGAATGTGCTTCCCACGTAGTGTGTTTTGTATTGGACCCTCGCAT                         |
| MB   | CY5-ACTGCCTGTCTGTGCCTGCTGTGGCAGT/iDabcyldT/TTTT-GTAATGGAGCTCGTCCTCAG            |

**Figure S1.** Analysis of some possible self-assembled products by 8% N-PAGE.

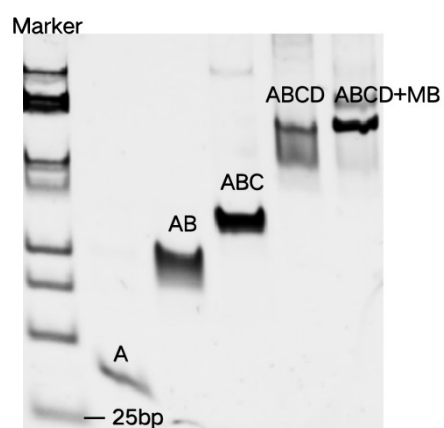

**Figure S2.** Schematic diagram of MB structure.

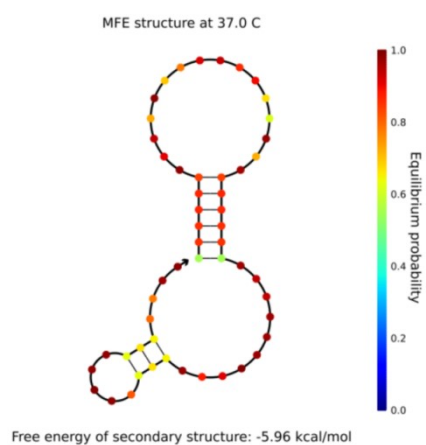

**Figure S3.** Mean grayscale intensity under different incubation times.

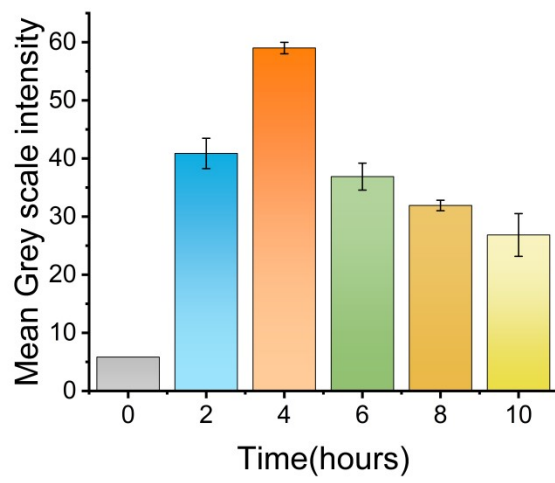

Supplement: d2an00418f1.pdf [file d2an00418f1.pdf]
